# Supplementary material for: Zein as a Basis of Recyclable Injection Moulded Materials: Effect of Formulation and Processing Conditions
Source: MDPI journal article supplement (doi:10.3390/polym15183841), 2023-09-21
Supplement: s1 [file s1]

## Supplementary Materials

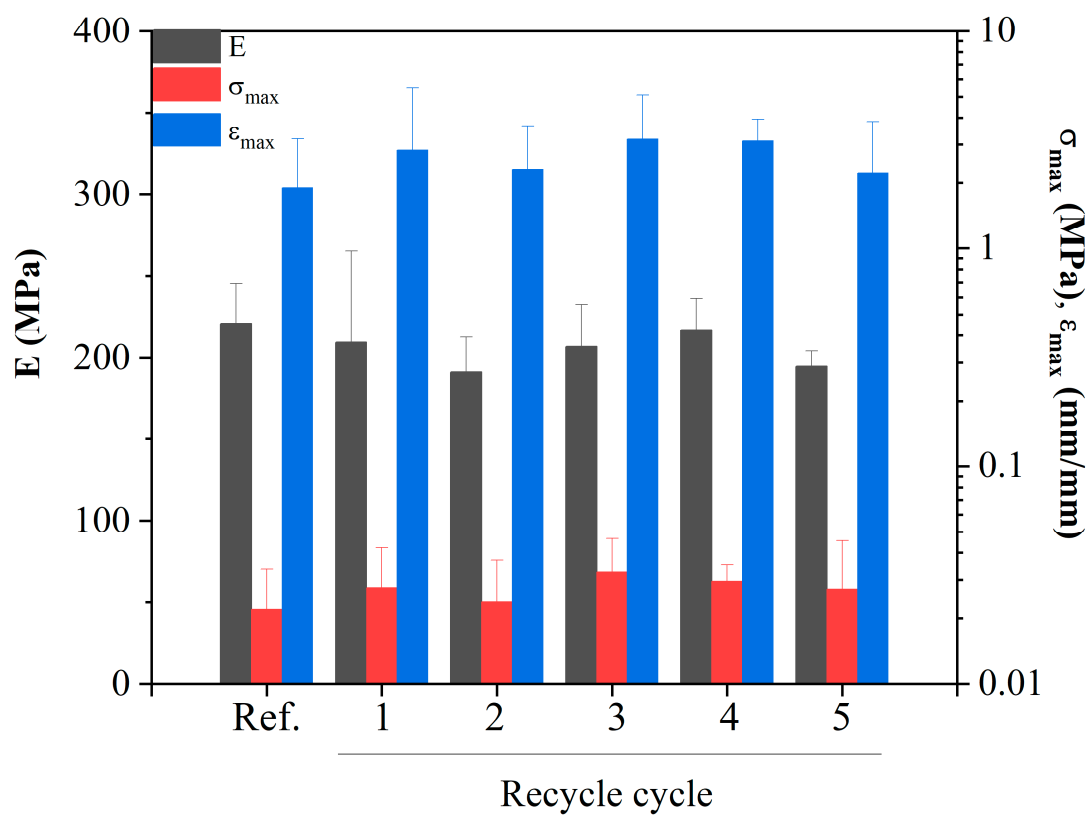

**Figure S1.** Mechanical properties of the re-processed zein-based bioplastics.
